# Supplementary material
Source: publisher site journal article supplement (https://www.dovepress.com/article/293823)

**Fig. S1 The weight of experimental mice during tumor growth.**


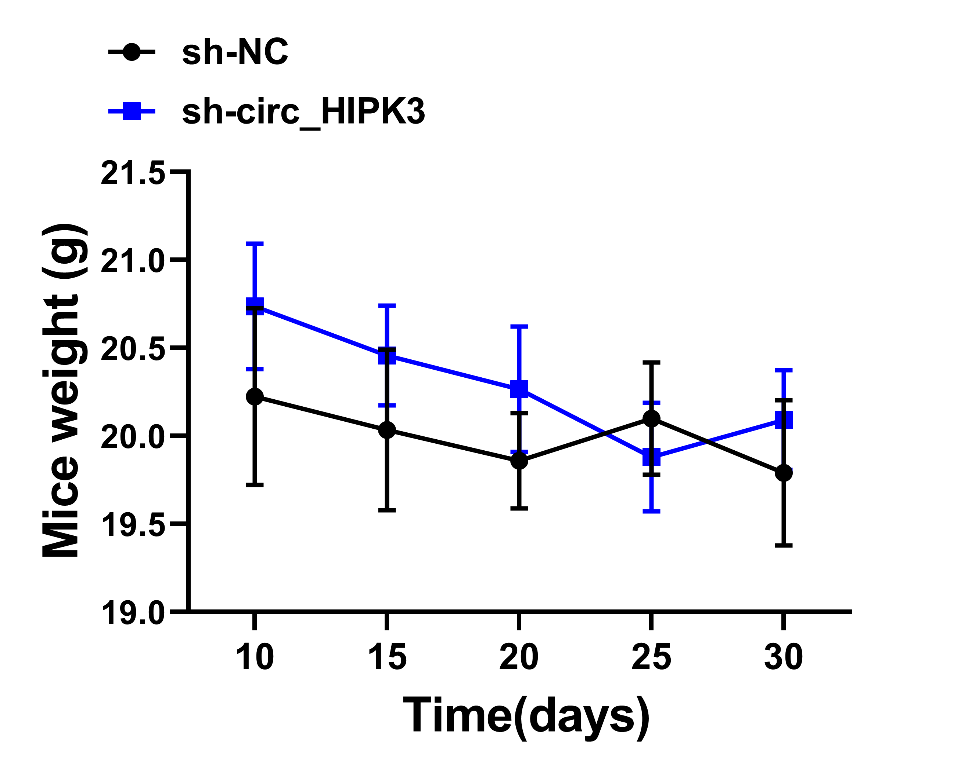

Supplement: Supplementary file 1 [file get_supplementary_file.php]
